# Supplementary material for: The Interplay between Chinese EFL Teachers’ Resilience and Agency
Source: Research Square preprint supplement (doi:10.21203/rs.3.rs-3220765/v1), 2023-08-07
Supplement: Supplementary file 1 [file 5f12b307f3e855fb4176c98a.docx]

**Appendix I**

**Trial questionnaire**

**Resilience**

1. I can get through difficult times because I’ve experienced difficulty before.

2.Failures double my motivation to succeed as a teacher.

3.I tend to recover my confidence quickly after hard times.

4.I tend to bounce back after illness or hardship.

5.It is hard for me to recover when something nervous happens.

**Agency belief**

1.Through hard work, I can solve work-related problems

2.I can know what to do when there is an unexpected situation at work.

3.I believe I can achieve my work goals.

4.I believe I am capable of solving the difficulties in my work.

5.No matter what happens at work, I believe I can deal with it.

**Agency actions**

1.I can set goals.

2.I can break down goals.

3.I can put the goals I set into action.

4.To achieve my goal, I can work hard.

5.I can implement ideas in my work.

**Demographic Information**
1.*Gender

Male

Female

2.Age

≤ 25

26-30

31-40

≥ 40

3.Highest Level of Education

Bachelor’s degree

Master’s degree

Doctor’s degree

Other

4.Professional rank

Teaching assistant

Lecturer/Assistant professor

Associate professor

Professor

Others

5.Teaching years

≤ 2

3-5

6-9

≥ 10

**Appendix II**

**Experimental questionnaire**

**Resilience**

1.Failures double my motivation to succeed as a teacher.

2.I tend to recover my confidence quickly after hard times.

3.I tend to bounce back after illness or hardship.

4.It is hard for me to recover when something nervous happens.

**Agency belief**

1.Through hard work, I can solve work-related problems

2.I believe I can achieve my work goals.

3.I believe I am capable of solving the difficulties in my work.

4.No matter what happens at work, I believe I can deal with it.

**Agency actions**

1.I can set goals.

2.I can put the goals I set into action.

3.To achieve my goal, I can work hard.

4.I can implement ideas in my work.

**Demographic Information**
1.Gender

Male

Female

2.Age

≤ 25

26-30

31-40

≥ 40

3.Highest Level of Education

Bachelor’s degree

Master’s degree

Doctor’s degree

Other

4.Professional rank

Teaching assistant

Lecturer/Assistant professor

Associate professor

Professor

Others

5.Teaching years

≤ 2

3-5

6-9

≥ 10

**Appendix III**

**Interview**

Can you tell me a story from each stage that will explain a bit more what you were experiencing?

Do you recall any particular incident in your life that influenced your choice of career?

What’s your comment on the development in the status of your career?

Do you think you work hard to attain your goals? If yes, what are the challenges?

Do you feel frustrated and give up when you face difficult and challenging sistuations?

Do you believe you pay active effort to improve yourself professionally? If yes, what are your efforts?

Do you have plans for your delopment in the following five years? If yes, what are the plans?
